# Supplementary material
Source: Research Square preprint supplement (doi:10.21203/rs.3.rs-9272013/v1)
Supplement: Supplementary file 1 [file 24e1ed98788323b33390c8f8.docx]

**Additional file 2:**

**Table S2: Attendance and meal participation of cases during the festive period (December 24–31)**

Each row represents an individual case. “X” indicates presence at the meal; blank cells indicate absence or no recorded participation.Dates are presented from December 24 to 31, with “L” indicating lunch and “D” indicating dinner.

| **ID** | **Dec 24** | | **Dec 25** | | **Dec 26** | | **Dec 27** | | **Dec 28** | | **Dec 29** | | **Dec 30** | | **Dec 31** | |
| --- | --- | --- | --- | --- | --- | --- | --- | --- | --- | --- | --- | --- | --- | --- | --- | --- |
|  | **L** | **D** | **L** | **D** | **L** | **D** | **L** | **D** | **L** | **D** | **L** | **D** | **L** | **D** | **L** | **D** |
| **13S** |  |  |  |  |  |  | **X** | **X** | **X** | **X** |  |  |  |  |  |  |
| **1C** | **X** | **X** | **X** | **X** | **X** | **X** | **X** | **X** | **X** | **X** | **X** | **X** | **X** | **X** | **X** | **X** |
| **7S** | **X** |  |  |  |  |  | **X** |  |  |  |  |  |  |  |  |  |
| **5S** | **X** |  | **X** |  | **X** |  | **X** |  | **X** |  | **X** |  | **X** |  | **X** |  |
| **14S** | **X** | **X** | **X** | **X** | **X** | **X** | **X** | **X** | **X** | **X** | **X** | **X** | **X** | **X** | **X** | **X** |
| **11S** | **X** |  | **X** |  | **X** |  | **X** |  | **X** |  | **X** |  |  |  | **X** |  |
| **16S** | **X** |  | **X** |  | **X** |  | **X** |  | **X** |  | **X** |  | **X** |  | **X** |  |
| **17S** |  |  |  |  |  |  | **X** | **X** | **X** | **X** |  |  |  |  |  |  |
| **10S** | **X** | **X** | **X** | **X** | **X** | **X** | **X** | **X** | **X** | **X** | **X** | **X** | **X** | **X** | **X** | **X** |
| **3C** |  |  |  |  |  |  | **X** |  |  |  |  |  |  |  |  |  |
| **9S** |  |  |  |  |  |  | **X** | **X** | **X** | **X** |  |  |  |  |  |  |
| **12S** | **X** |  | **X** |  | **X** |  | **X** |  | **X** |  | **X** |  |  |  | **X** |  |
| **2C** | **X** |  | **X** | **X** | **X** | **X** | **X** | **X** | **X** | **X** | **X** | **X** | **X** | **X** | **X** | **X** |
| **6S** | **X** | **X** | **X** | **X** | **X** | **X** | **X** | **X** | **X** | **X** | **X** | **X** | **X** | **X** | **X** | **X** |
| **4S** | **X** |  | **X** |  | **X** |  | **X** |  | **X** |  | **X** |  | **X** |  | **X** |  |
| **15S** | **X** |  | **X** |  | **X** |  | **X** |  | **X** |  | **X** |  | **X** |  | **X** |  |
| **8S** |  |  |  |  |  |  |  |  |  |  |  |  |  |  |  |  |
| **18S** |  | **X** |  |  |  |  |  | **X** |  | **X** |  |  |  | **X** |  |  |
| **19S** |  |  |  |  |  |  |  |  |  |  |  |  |  |  |  |  |
