# Supplementary material
Source: Research Square preprint supplement (doi:10.21203/rs.3.rs-9272013/v1)
Supplement: Supplementary file 2 [file cebfe9ec03c494b8ad58e78e.docx]

**Additional file 1:**

**Table S1: Food and beverage items consumed during the event, categorized by preparation method and origin**

Food items were classified according to preparation method (uncooked, cooked, highly cooked) and origin (industrial vs local). Highly cooked foods were defined as items subjected to prolonged heating or high-temperature cooking. Uncooked items included foods and beverages consumed without heat treatment, including those prepared with untreated water.

Botanical and zoological names are provided where relevant. Beverage items diluted with rainwater or consumed from environmental sources are highlighted due to potential exposure risk.

**Additional file 2:**

**Table S2: Attendance and meal participation of cases during the festive period (December 24–31)**

Each row represents an individual case. “X” indicates presence at the meal; blank cells indicate absence or no recorded participation.Dates are presented from December 24 to 31, with “L” indicating lunch and “D” indicating dinner.

**Additional file 3:**

**Table S3: Individual consumption of selected food and beverage items among cases**

Each row represents a case. “x” indicates reported consumption of the item; blank cells indicate no reported consumption; “?” indicates missing or uncertain information.

Food and beverage items were selected based on their potential relevance to exposure. Beverages include those prepared with rainwater or consumed directly from environmental sources (cistern or garden hose)

**Additional file 4:**

**Figure S1: Geographic overview of the exposure setting and water sources during the outbreak**

Satellite view of the study area showing the location of the festivities (“Eika” and Pastor’s house) and surrounding environment. The rainwater catchment cistern used for drinking water is indicated, as well as the outdoor kitchen where fruit juice was prepared using water from a rain barrel. Insets illustrate the festivities setting, the rainwater collection system, and the kitchen environment. Arrows indicate the spatial relationship between key locations and potential exposure sources.
