# Supplementary material
Source: Research Square preprint supplement (doi:10.21203/rs.3.rs-9272013/v1)

**Additional file 4:**

**Figure S1: Geographic overview of the exposure setting and water sources during the outbreak**

Satellite view of the study area showing the location of the festivities (“Eika” and Pastor’s house) and surrounding environment. The rainwater catchment cistern used for drinking water is indicated, as well as the outdoor kitchen where fruit juice was prepared using water from a rain barrel. Insets illustrate the festivities setting, the rainwater collection system, and the kitchen environment. Arrows indicate the spatial relationship between key locations and potential exposure sources.


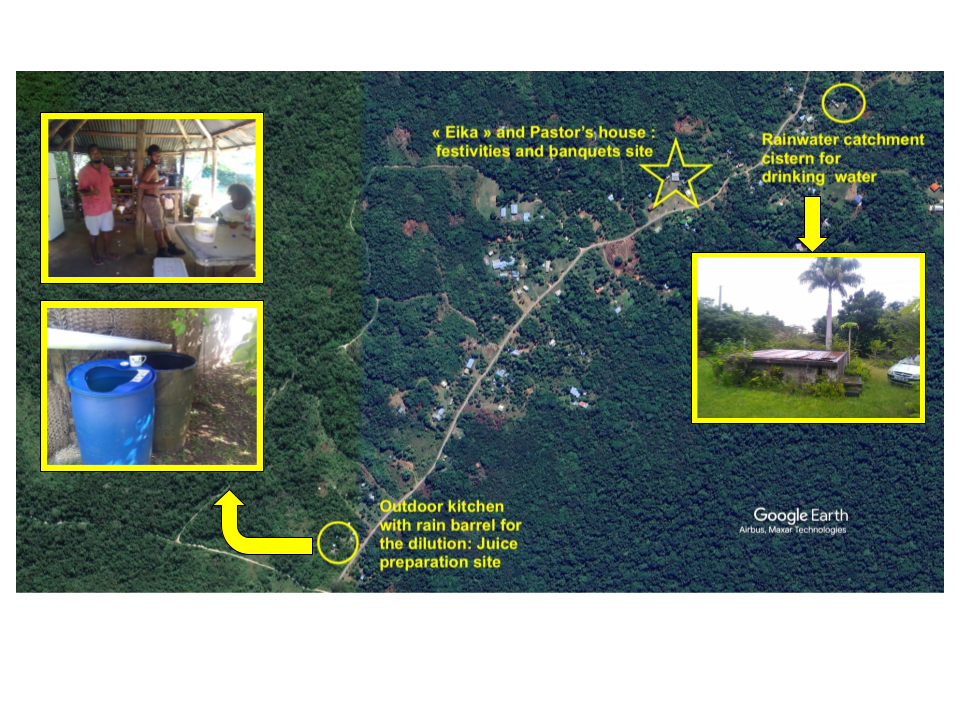

Supplement: Supplementary file 3 [file e334fa61f86fd8af0cc9173a.docx]
