# Supplementary material
Source: Research Square preprint supplement (doi:10.21203/rs.3.rs-9272013/v1)
Supplement: Supplementary file 5 [file fcc980309c1fe55bd940198b.docx]

**Additional file 3:**

**Table S3: Individual consumption of selected food and beverage items among cases**

Each row represents a case. “x” indicates reported consumption of the item; blank cells indicate no reported consumption; “?” indicates missing or uncertain information.

Food and beverage items were selected based on their potential relevance to exposure. Beverages include those prepared with rainwater or consumed directly from environmental sources (cistern or

| study ID | **Food items** | | |  | **Beverage** | | | |
| --- | --- | --- | --- | --- | --- | --- | --- | --- |
| Pacific rose apple | rose apple salad | green papaya salad |  | blended fruit juice | homemade lemonade | cistern rainwater | garden hose |
| 13S | x | x |  |  | x | x | x | x |
| 1C | x | x | x |  | x | x | x | x |
| 7S | x | x | x |  | x |  | x | x |
| 5S | x | x |  |  | x | x | x | x |
| 14S | x | x |  |  | x | x | x |  |
| 11S | x | x | x |  | x | x | x | x |
| 16S | x | x | x |  | x | x | x |  |
| 17S | x | x |  |  | x | x | x | x |
| 19S | x | x | x |  | x | x | x |  |
| 10S | x | x | x |  | x | x | x | x |
| 3C | x |  |  |  | x | x | x | x |
| 9S |  |  |  |  | x | x | x | x |
| 12S | x | x | x |  | x | x | x |  |
| 2C | x | x | x |  | x | x | x |  |
| 6S | x | x | x |  | x | x | x |  |
| 4S | x | x | x |  | x | x | x |  |
| 18S | x |  |  |  |  | x | x |  |
| 15S | x | x | x |  | x | x | x |  |
| 8S | ? | ? | ? |  | ? | ? | ? | ? |
